1 **Head-to head comparison of anterior nares and nasopharyngeal swabs for SARS-CoV-2**  
2 **antigen detection in a community drive-through test centre in the UK**

3

4 Rachel L Byrne<sup>1</sup>, Ghaith Aljayyousi<sup>1</sup>, Konstantina Kontogianni<sup>1</sup>, Karina Clerkin<sup>1</sup>, Mathew  
5 McIntyre<sup>1</sup>, Jahanara Wardale<sup>1</sup>, Christopher T Williams<sup>1</sup>, CONDOR steering group, Richard  
6 Body<sup>2</sup>, Emily R Adams<sup>1,3</sup>, Margaretha de Vos<sup>4</sup>, Camille Escadafal<sup>4</sup>, Ana I Cubas Atienzar<sup>1</sup>.

7

8 <sup>1</sup>Liverpool School of Tropical Medicine, Centre for Drugs and Diagnostics, Liverpool, UK

9 <sup>2</sup> Manchester University NHS Foundation Trust, UK

10 <sup>3</sup>Global Access Diagnostics, Bedfordshire, UK

11 <sup>4</sup>FIND, Geneva, Switzerland

12

13 \* Corresponding author Ana I Cubas Atienzar [Ana.CubasAtienzar@lstmed.ac.uk](mailto:Ana.CubasAtienzar@lstmed.ac.uk)

14

15 Keywords: SARS-CoV-2, COVID-19, Nasal swabs, nasopharyngeal swabs, antigen detection,

16 RDT, LFA, head-to-head comparison.

17 **Abstract:**

18 **Objective:** To conduct a head-to-head diagnostic accuracy evaluation of professionally taken  
19 anterior nares (AN) and nasopharyngeal (NP) swabs for SARS-CoV-2 antigen detection using  
20 rapid diagnostic tests (Ag-RDT).

21 **Methods:** NP swabs for SARS-CoV-2 reverse transcription quantitative polymerase chain  
22 reaction (RT-qPCR) testing and paired AN and NP swabs for the antigen detection were  
23 collected from symptomatic participants enrolled at a community drive-through COVID-19  
24 test centre in Liverpool. Two Ag-RDT brands were evaluated: Sure-Status (PMC, India) and  
25 Biocredit (RapiGEN, South Korea). The visual read out of the Ag-RDT test band was  
26 quantitative scored and the 50% and 95% limit of detection (LoD) of both Ag-RDT brands  
27 using AN and NP swabs was calculated using a probabilistic logistic regression model.

28 **Results:** A total of 604 participants were recruited of which 241 (40.3%) were SARS-CoV-2  
29 positive by RT-qPCR. Sensitivity and specificity of AN swabs was equivalent to the obtained  
30 with NP swabs: 83.2% (75.2-89.4%) and 98.8% (96.5-99.6%) utilising NP swabs and 84.0%  
31 (76.2-90.1%) and 99.2% (97.0-99.8%) with AN swabs for Sure-Status and; 81.2% (73.1-  
32 87.7%) and 99.0% (94.7-86.5%) with NP swabs and 79.5% (71.3-86.3%) and 100% (96.5-  
33 100%) with AN swabs for Biocredit. The agreement of the AN and NP swabs was high for  
34 both brands with an inter-rater reliability ( $\kappa$ ) of 0.918 and 0.833 for Sure-Status and  
35 Biocredit, respectively. The overall 50% LoD and 95% LoD was  $0.9-2.4 \times 10^4$  and  $3.0-3.2 \times 10^8$   
36 RNA copies/mL for NP swabs and  $0.3- 1.1 \times 10^5$  and  $0.7-7.9 \times 10^7$  RNA copies/mL and for AN  
37 swabs with no significant difference on LoD for any of the swabs types or test brands.  
38 Quantitative read-out of test line intensity was more often higher when using NP swabs  
39 with significantly higher scores for both Ag-RDT brands.

40 **Conclusions:** the diagnostic accuracy of the two SARS-CoV-2 Ag-RDTs brands evaluated in  
41 this study was equivalent using AN swabs than NP swabs. However, test line intensity was  
42 lower when using AN swabs which could influence negatively the interpretation of the Ag-  
43 RDT results for lay users. Studies on Ag-RDT self-interpretation using AN and NP swabs are  
44 needed to ensure accurate test use in the wider community.

45 **Abstract word count: 345**

46

## 47 **Introduction**

48 To meet the immense diagnostic demand of the COVID-19 pandemic, the development of  
49 rapid diagnostic tests for the detection of SARS-CoV-2 antigens (Ag-RDTs) became a priority  
50 [1]. Nasopharyngeal (NP) swabs are considered the standard of care for SARS-CoV-2  
51 detection[2] and thus the majority of Ag-RDT kits are developed for NP swabs exclusively  
52 [1]. However, the use of anterior nasal (AN) swabs has been increasing as a less invasive  
53 alternative to promote access to testing in the community and facilitate mass testing  
54 programmes particularly in the UK [3].

55 For Ag-RDTs, studies on Ag-RDTs comparing sensitivity on AN swabs and NP swabs are very  
56 limited, with only two reported studies performed on the same Ag-RDT brand, Standard-Q  
57 (SD Biosensor, Inc., Korea), one study on professional taken swabs [6] and another in self-  
58 taken [7]. Sensitivity obtained with AN swabs was comparable (although 3% to 5% lower)  
59 than with NP swabs sensitivity but neither of the swab types fulfilled WHO target product  
60 profile (TPP) standards in any of the two studies [8]. AN swabs are considered accurate and  
61 clinically acceptable alternatives to NP swabs in outpatient settings for SARS-CoV-2 reverse  
62 transcription polymerase chain reaction (RT-PCR) testing [4]. However, an in depth  
63 metaanalysis on SARS-CoV-2 RT-PCR testing found that anterior nares specimens were 12%-  
64 18% less sensitive than NP swabs [5].

65 The aim of this study was to perform a head-to-head evaluation on two World Health  
66 Organisation (WHO) approved or under assessment for Emergency Use listing (WHO-EUL)  
67 SARS-CoV-2 Ag-RDT brands marketed for AN and NP swabs: Sure-Status COVID-19 Antigen  
68 Card Test (Premier Medical Corporation, India) and Biocredit COVID-19 Antigen Test  
69 (RapiGEN, South Korea) respectively. This study is of particular interest in the UK as the use

70 of home Ag-RDTs on AN swabs has been integral to combatting the spread of COVID-19  
71 during the pandemic [3], as on the 1<sup>st</sup> of April 2022 free national RT-PCR COVID-19 testing  
72 was suspended, with the purchase of Ag-RDTs using AN-swabs online or in pharmacies the  
73 only approach to access COVID-19 testing in a non-clinical setting.

## 74 **Methods**

### 75 **Clinical evaluation**

76 This was a prospective evaluation of consecutive participants enrolled at a community  
77 National Health Service (NHS) drive-through COVID-19 test centre located at the Liverpool  
78 John Lennon Airport. Two Ag-RDT brands were evaluated; Sure-Status COVID-19 Antigen  
79 Card Test (Premier Medical Corporation India) and Biocredit COVID-19 Antigen Test  
80 (RapiGEN, South Korea) referred as Sure-Status and Biocredit thereafter. The study  
81 progressed until at least 100 Ag-RDT positives using AN swabs in line with WHO's  
82 requirements for evaluation of alternative sample type [10].

83 All adults over the age of 18 who attended the drive-through test centre with symptoms of  
84 COVID-19 were asked to participate in the study. The symptoms included fever, cough,  
85 shortness of breath, tight chest, chest pain, runny nose, sore throat, anosmia, ageusia,  
86 headache, vomiting, abdominal pain, diarrhoea, confusion, rash, or tiredness. Participants  
87 were recruited under the Facilitating Accelerated COVID-19 Diagnostics (FALCON) study  
88 using verbal consent. Ethical approval was obtained from the National Research Ethics  
89 Service and the Health Research Authority (IRAS ID:28422, clinical trial ID: NCT04408170).

90 Swabs were collected following the same process with the NP swab collected first in one  
91 nostril and placed in Universal Transport Media (UTM) (Copan Diagnostics Inc, Italy) for the

92 reference RT-qPCR test. This was followed by the collection of two swabs to evaluate the  
93 Ag-RDTs, first an NP swab in the other nostril and finally a AN swab in both nostrils following  
94 the manufacturer's instructions for use (IFU). Samples were given a unique identification  
95 code and transported within cooler bags to the Liverpool School of Tropical Medicine  
96 (LSTM) where samples were processed in category level 3 (CL3) containment laboratory  
97 upon arrival.

98 Sure-Status and Biocredit Ag-RDTs were carried out following their instructions for use (IFU).  
99 The protocol for both Ag-RDT was the same when using AN and NP swabs. Results were  
100 read by two operators, blinded to one another and if a discrepant result occurred, a third  
101 operator acted as a tiebreaker. The visual read out of the Ag-RDT test band was scored on a  
102 quantitative scale from 1 (weak positive) - 10 (strong positive). Ag-RDT results were  
103 classified as invalid when the control line was absent.

104 RNA was extracted using the QIAamp® 96 Virus QIAcube® HT kit (Qiagen, Germany) on the  
105 QIAcube® (Qiagen, Germany) and screened using TaqPath COVID-19 (ThermoFisher, UK) on  
106 the QuantStudio 5™ thermocycler (ThermoFisher, UK), an internal extraction control was  
107 incorporated before the lysis stage, as recommended by the manufacturer. SARS-CoV-2 RT-  
108 qPCR result was considered (1) positive if any two of the three SARS-CoV-2 target genes (N  
109 gene, ORF1ab and S gene) amplified with cycle threshold (Ct)  $\leq$  40, (2) indeterminate if only  
110 one SARS-CoV-2 gene amplified and (3) negative if the internal extraction control amplified  
111 and the SARS-CoV-2 target genes did not. Samples with invalid RT-qPCR results (no  
112 amplification of the internal extraction control) were re-extracted and re-run once. Viral  
113 loads in UTM swabs were measured with a ten-fold serial dilution standard curve of

114 quantified specific in vitro-transcribed RNA using five replicates for each standard curve  
115 point [11].

## 116 **Statistical Analysis**

117 Sensitivity, specificity, positive predicted value (PPV) and negative predictive values (NPV)  
118 were calculated with 95% confidence intervals (CIs) by comparing the Ag-RDT results to the  
119 RT-qPCR, as the reference standard. Sub-analyses of diagnostic performance were  
120 performed by swab type (AN and NP), Ct-value ranges, onset of symptoms and vaccination  
121 status using nonparametric statistics. The level of agreement between AN and NP swabs  
122 was determined using Cohen's kappa ( $\kappa$ ) [10]. The correlation between test line intensity  
123 and viral loads were measured by Person correlation coefficient ( $r_p$ ) [12] and to further  
124 analyse Ag-RDT sensitivities, we used logistic regression, with RNA copy numbers of the RT-  
125 qPCR NP swab and swab type (AN and NP) as independent variables and test outcomes as  
126 the dependent variable, yielding detection probabilities for each viral load level. Statistical  
127 analyses were performed using SPSS V.28.0, Epi Info V3.01 and R scripts. Statistical  
128 significance was set at  $P < 0.05$ .

## 129 **Results**

### 130 Participant demographics

131 A total of 604 participants were recruited for this study, 372 recruited between August and  
132 October 2021 were enrolled for the Sure-Status Ag-RDT evaluation and 232 recruited  
133 between December 2021 and March 2022 were enrolled for the Biocredit Ag-RDT  
134 evaluation. Details of the demographics of the population of study are found in Table 1. Our  
135 study population had a mean age of 43 years (range 18-81, interquartile range [IQR] 33.0-

136 50.0), 348 (58%) were female and 566 were British (94%), with the remaining 36  
137 participants being of other ethnic groups (n = 14), white background (n = 9), Asian (n = 8),  
138 mix white and black backgrounds (n = 2) and Arab (n = 1). Three hundred and fourteen  
139 participants of the 372 enrolled for the Sure-Status evaluation (84.4%) and 217 participants  
140 of the 232 recruited for Biocredit (93.5%) received complete SARS-CoV-2 vaccination (2  
141 doses). Additionally, 143 of the participants enrolled from December 2021 (61.6%) for the  
142 Biocredit evaluation received a third dose as part of the UK booster roll out [13]. All  
143 participants were symptomatic with a median onset of symptoms of 2 days (IQR 1-3). The  
144 most common symptoms were cough (387, 64.3%), sore throat (232, 38.5%), headache  
145 (203, 33.7%), fever (160, 26.6%), body aches (80, 13.3%) and runny nose (80, 13.3%) (Table  
146 1).

147 Overall, 241 participants (40.3%, CI95% 36.3-44.4%) were SARS-CoV-2 positive by RT-qPCR,  
148 6 had indeterminate RT-qPCR results and the remaining 355 were negative. Participants  
149 with indeterminate RT-qPCR results were excluded from further analysis.

150 RT-qPCR positivity was significantly higher ( $p < 0.05$ ) among the participants enrolled for the  
151 Biocredit evaluation cohort (53.7%, CI95% 47-60.4%) during December 2021 and March  
152 2022 which coincided with the Omicron wave in the UK [14] than among the participants  
153 enrolled between August and October 2021 (32.1%, CI95% 27.4-37.1%) when Delta was the  
154 dominant SARS-CoV-2 variant.

155 Diagnostic evaluation

156 *Sure Status*



157 The overall sensitivity and specificity for the Sure-Status Ag-RDT compared to RT-qPCR was  
158 83.2% (CI95% 75.2-89.4%) and 98.8% (CI95% 96.5-99.6%) utilising NP swabs and 84.0%  
159 (CI95% 76.2-90.1%) and 99.2% (CI95% 97.0-99.8%) with AN swabs. For individuals with Cts <  
160 25, the sensitivity was 91.8% (CI95% 84.5-96.4%) and 93.8% (CI95% 87.2-97.7%) for NP and  
161 AN-swabs respectively. Seven Ag-RDTs gave invalid results, one NP swab (0.03%) sample and  
162 six AN swab samples (1.6%). Participants with invalid Ag-RDTs results were excluded from  
163 further analysis. Four SARS-CoV-2 positive cases were detected by NP only (3.4%) and six  
164 cases were detected by AN only (5.0%) but this discrepancy on sensitivity between swab  
165 types was not significant ( $P = 0.43$ ). The percentage of agreement of NP and AN swab using  
166 Sure-Status was 96.7% (95% CI 94.3-98.3%) and inter-rater reliability was almost perfect ( $\kappa =$   
167 0.918). Inter-rater reliability was strong for both NP ( $\kappa = 0.871$ ) and AN ( $\kappa = 0.852$ ) swabs  
168 when compared to RT-qPCR.

#### 169 *Biocredit*

170 For the Biocredit Ag-RDT the sensitivity and specificity were 81.2% (CI95%73.1-87.7%) and  
171 99.0% (CI95%94.7-86.5%) with NP swabs and 79.5% (CI95%71.3-86.3%) and 100%  
172 (CI95%96.5-100%) with AN sampling compared to RT-qPCR. Sensitivity was 92.2%  
173 (CI95%84.6-96.8%) and 95.5% (CI95%89.0-98.8%) using NP and AN swabs among  
174 participants with Ct < 25. Ten SARS-CoV-2 positive cases were detected solely by NP (8.2%)  
175 and eight cases were detected only by AN (6.6%) but no significance on sensitivity was  
176 observed between NP and AN swabs for this brand of Ag-RDTs either ( $P = 0.43$ ). The  
177 percentage of agreement of NP and AN swab for Biocredit was 91.6% (95% CI 87.2-94.9%)  
178 and inter-rater reliability was strong ( $\kappa = 0.833$ ). Inter-rater reliability was moderate for both

179 NP ( $\kappa = 0.790$ ) and AN ( $\kappa = 0.782$ ) sampling compared to RT-qPCR. Diagnostic accuracy for  
180 both Sure-Status and Biocredit is displayed in Table 2.

### 181 *Head to head comparison of Sure Status and Biocredit*

182 We report no significant difference in the diagnostic accuracy among participants with  
183 symptoms irrespective of days since onset, or vaccination status for all Ag-RDTs and  
184 swabbing combination (all  $P$  values  $> 0.05$ ). Both Biocredit and Sure-Status Ag-RDTs using  
185 both swab types had better sensitivities on detecting SARS-CoV-2 antigens on individuals  
186 with Ct values  $< 25$  than  $>30$  ( $P = 0.029$  in NP and  $P = 0.047$  in AN for Sure-Status and  $P =$   
187  $0.018$  and  $P = 0.001$  for Biocredit).

188 The RNA copy numbers per mL (RNA copies/mL) of RT-PCR NP swabs was calculated and  
189 statistically higher viral loads were obtained for the Sure-Status cohort than Biocredit (Fig 1)  
190 measured by Kruskal–Wallis ( $P = 0.006$ ). We determined the 50% and 95% limits of detection  
191 (LoD) for both Ag-RDT and swab types based on a logistic regression model (Fig 2). For Sure-  
192 Status, the RNA copies/mL for 50% LoD and 95% LoD were  $2.4 \times 10^4$  and  $3.16 \times 10^8$  for NP  
193 specimen and  $3.4 \times 10^4$  and  $7.94 \times 10^7$  for AN swabs. For Biocredit, the RNA copies/mL for  
194 LoD50 and LoD95 were  $9.12 \times 10^3$  and  $3.02 \times 10^8$  for NP specimen and  $1.12 \times 10^5$  and  $6.76 \times$   
195  $10^6$  for AN swabs. Although the LoD95 was better for AN swabs for both Ag-RDT brands  
196 ( $3.98$  for Sure-Status and  $44.67$  for Biocredit), there was no statistical difference on LODs  
197 neither by swab type and Ag-RDT brand (all  $P$  values  $> 0.05$ ).

### 198 *Quantitative read-out analysis*

199 Quantitative read-out in paired positive AN and NP was more often higher for the NP (40  
200 instances higher on NP and four higher on AN in Sure-Status; and 35 instances higher on NP

201 and 12 higher on AN in Biocredit) and gave significantly higher scores for both Ag-RDT, Sure-  
202 Status ( $P = 0.007$ ) and Biocredit ( $P = 0.013$ ) (Figure 1) measured by Kruskal–Wallis.  
203 Additionally, test lines scores were analysed by RNA copies/mL and these had a positive  
204 correlation. For Biocredit, strong correlation using AN swabs ( $r_p = 0.727$ ) but moderate using  
205 NP swabs ( $r_p = 0.591$ ). For Sure-Status, both swab types had a moderate correlation to viral  
206 loads (NP swab  $r_p = 0.614$  and AN swab  $r_p = 0.661$ ).

## 207 **DISCUSSION**

208 This is the first diagnostic clinical evaluation of Sure-Status Ag-RDT and results have shown a  
209 satisfactory performance for both AN and NP swabs fulfilling the sensitivity ( $\geq 80\%$ ) and  
210 specificity ( $\geq 97\%$ ) outlined in the target product profile (TPP) WHO standards [8]. For  
211 Biocredit Ag-RDT, there are five studies to date that have evaluated the performance of NP  
212 swabs reporting varied sensitivities from 52% to 85% [15]. In this study we report a higher  
213 sensitivity (81.2% ,CI95%73.1-87.7%) and specificity (99.0% ,CI95%94.7-86.5%) of the  
214 Biocredit Ag-RDT fulfilled the WHO standards using NP swab but underperformed in the  
215 sensitivity (79.5%, CI95% 71.3-86.3%) criteria when using AN.

216 Results presented here demonstrate that AN swabs are equivalent to NP swabs for SARS-  
217 CoV-2 Ag-RDT testing giving comparable sensitivities, 50% LoD and 95% LoD for both Ag-  
218 RDTs brands evaluated here. Our results supports previous findings where AN and NP swabs  
219 were compared for the Ag-RDT Standard-Q (SD Biosensor, Inc., Korea) in Lesotho [6], but we  
220 reported a higher sensitivity compared to the 67.3% and 70.2% for AN and NP swabs  
221 previously described [6]. Studies on RT-qPCR have found lower sensitivity using AN swabs  
222 compared to NP swabs consistently [5]. However, the difference in sensitivity was only  
223 significant for patients with viral loads  $< 10^3$  copies/mL [16] and this threshold is not

224 relevant to Ag-RDTs of which the limit of detection ranges between  $10^4$ -  $10^8$  RNA copies/mL  
225 in swabs [11].

226 Quantitative assessment of the test line scores showed that test line intensity was  
227 significantly higher on NP swabs than AN swabs. The line intensity is an important  
228 component of home testing as studies have shown fainter lines are more difficult to  
229 interpret for a lay person, likely due to lower signal intensity [17]. In an user experience  
230 home based study, 77.1% of the cases that the participants interpreted wrongly as negative  
231 being positive, were weak and moderate positives while only 22.9% were strong positives  
232 [17]. The significantly lower intensity of the AN swab compared to NP swab is likely  
233 attributed to the differences of SARS-CoV-2 viral loads in the respiratory tract. Studies have  
234 found lower viral loads on AN swabs compared to NP swabs [16]. Statistical analysis  
235 supported this hypothesis where a positive correlation between viral loads and Ag-RDT test  
236 line scores was shown. Further implementation studies on Ag-RDT test results interpretation  
237 by patients or within a home testing setting are urgently needed to drive self-testing to  
238 scale.

239 This study has several strengths, the use of standardised sampling methods, independent  
240 blinded readers, robust statistical analysis, quantitative assessment of Ag-RDT test line  
241 results and the evaluation of one approved WHO-EUL Ag-RDT test brands (Sure-Status) and  
242 under review (Biocredit). Qualifying it to have high global public health relevance [18].

243 The main limitation of this study is that the AN swabs were always taken last. The order of  
244 sample collection could have negatively biased the results obtained for AN swabs caused by  
245 a possible sample depletion. However, in the two studies that compared Ag-RDT using AN  
246 swabs, the AN swab was collected first and our reported sensitivity and specificity for AN

247 swabs are greater than the previous studies [6,7]. Further, studies on RT-qPCR found lower  
248 sensitivity using AN swabs compared to NP swabs [5], even when AN swabs were collected  
249 first [15,18,19]. Thereby it is unlikely that the order of the swabs impacted sample  
250 availability for AN and NP sampling.

251 In conclusion, this study demonstrates the sensitivity of two SARS-CoV-2 Ag-RDTs using AN-  
252 sampling are comparable to that of NP-sampling. AN-sampling can be performed with less  
253 training, reduces patient discomfort, and enables scaling up of antigen testing strategies.  
254 Test line intensity however is lower when using AN swabs which could influence negatively  
255 the interpretation of the Ag-RDT results. Additional studies on Ag-RDTs using AN swabs on  
256 self-interpretation by a lay person are needed and further education around how to  
257 interpret a positive Ag-RDT to the wider community.

## 258 **Acknowledgements**

259 Condor steering group: Dr A. Joy Allen, Dr Julian Braybrook, Professor Peter Buckle, Ms  
260 Eloise Cook, Professor Paul Dark, Dr Kerrie Davis, Dr Gail Hayward, Professor Adam Gordon,  
261 Ms Anna Halstead, Dr Charlotte Harden, Dr Colette Inkson, Ms Naoko Jones, Dr William  
262 Jones, Professor Dan Lasserson, Dr Joseph Lee, Dr Clare Lendrem, Dr Andrew Lewington, Ms  
263 Mary Logan, Dr Massimo Micocci, Dr Brian Nicholson, Professor Rafael Perera-Salazar, Mr  
264 Graham Prestwich, Dr D. Ashley Price, Dr Charles Reynard, Dr Beverley Riley, Professor John  
265 Simpson, Dr Valerie Tate, Dr Philip Turner, Professor Mark Wilcox, Dr Melody Zhifang.

266 We would like to acknowledge the participants for volunteering for this study and to the UK  
267 National Institute for Health Research Clinical Research Network and the COvid-19 National  
268 DiagnOstic Research & evaluation (CONDOR) programme. We also thank the CRN for their  
269 support during the study and Daisy Bengey, Rachel Watkins, and Lorna Finch for their help  
270 on sample collection and recruitment.

271 **FUNDING**

272 This work was funded as part of FIND's work as co-convener of the diagnostics pillar of the  
273 Access to COVID-19 Tools (ACT) Accelerator, including support from Unitaid [grant number:  
274 2019-32-FIND MDR], the governments of the Netherlands [grant number: MINBUZA-  
275 2020.961444] and from UK Department for International Development [grant number  
276 300341-102]. The FALCON study was funded by the National Institute for Health Research,  
277 Asthma UK and the British Lung Foundation.

278 **REFERENCES**

- 279 1 FIND. SARS-CoV-2 diagnostic pipeline. <https://www.finddx.org/covid-19/pipeline/>
- 280 2 Center of Disease Control and Prevention. Interim Guidelines for Collecting, Handling, and  
281 Testing Clinical Specimens for COVID-19. May 22, 2020.
- 282 3 GOV.UK. New campaign urges public to get tested twice a week. Published Online First:  
283 2021. [https://www.gov.uk/government/news/new-campaign-urges-public-to-get-tested-](https://www.gov.uk/government/news/new-campaign-urges-public-to-get-tested-twice-a-week)  
284 [twice-a-week](https://www.gov.uk/government/news/new-campaign-urges-public-to-get-tested-twice-a-week)
- 285 4 Péré H, Péré H, Péré H, *et al.* Nasal swab sampling for SARS-CoV-2: A convenient alternative  
286 in times of nasopharyngeal swab shortage. *J. Clin. Microbiol.* 2020. doi:10.1128/JCM.00721-  
287 20
- 288 5 Zhou Y, OLeary TJ. Relative sensitivity of anterior nares and nasopharyngeal swabs for initial  
289 detection of SARS-CoV-2 in ambulatory patients: Rapid review and meta-Analysis. *PLoS One.*  
290 2021. doi:10.1371/journal.pone.0254559
- 291 6 Labhardt, Niklaus D González Fernández L, Katende, Bulemba Muhairwe J, Bresser M, *et al.*  
292 Head-to-head comparison of nasal and nasopharyngeal sampling using SARS-CoV-2 rapid  
293 antigen testing in Lesotho. *medRxiv* Published Online First: 2022.  
294 doi:10.1101/2021.12.29.21268505

- 295 7 Lindner AK, Nikolai O, Kausch F, *et al.* Head-to-head comparison of SARS-CoV-2 antigen-  
296 detecting rapid test with self-collected anterior nasal swab versus professional-collected  
297 nasopharyngeal swab. *Eur Respir J*  
298 2020;**57**:2003961.<http://erj.ersjournals.com/lookup/doi/10.1183/13993003.03961-2020>
- 299 8 (WHO) WHO, R&D Blue Print WH (HQ). Target product profiles for priority diagnostics to  
300 support response to the COVID-19 pandemic v.1.0. Published Online First:  
301 2020.[https://www.who.int/publications/m/item/covid-19-target-product-profiles-for-](https://www.who.int/publications/m/item/covid-19-target-product-profiles-for-priority-diagnostics-to-support-response-to-the-covid-19-pandemic-v.0.1)  
302 [priority-diagnostics-to-support-response-to-the-covid-19-pandemic-v.0.1](https://www.who.int/publications/m/item/covid-19-target-product-profiles-for-priority-diagnostics-to-support-response-to-the-covid-19-pandemic-v.0.1)
- 303 9 GOV.UK. People with a positive lateral flow test no longer required to take confirmatory PCR  
304 test. Published Online First: 2021.[https://www.gov.uk/government/news/people-with-a-](https://www.gov.uk/government/news/people-with-a-positive-lateral-flow-test-no-longer-required-to-take-confirmatory-pcr-test)  
305 [positive-lateral-flow-test-no-longer-required-to-take-confirmatory-pcr-test](https://www.gov.uk/government/news/people-with-a-positive-lateral-flow-test-no-longer-required-to-take-confirmatory-pcr-test)
- 306 10 World Health Organization (WHO). Prequalification Teams D. Instructions and requirements  
307 for Emergency Use Listing (EUL) Submission: In vitro diagnostics detecting SARS-CoV-2 nucleic  
308 acid or antigen.  
309 [https://extranet.who.int/pqweb/sites/default/files/documents/220317\\_PQDx\\_347\\_Version6](https://extranet.who.int/pqweb/sites/default/files/documents/220317_PQDx_347_Version6_NAT-Ag.pdf)  
310 [\\_NAT-Ag.pdf](https://extranet.who.int/pqweb/sites/default/files/documents/220317_PQDx_347_Version6_NAT-Ag.pdf)
- 311 11 Cubas-Atienzar, Ana I., Kontogianni K, Edwards T, *et al.* Limit of detection in different  
312 matrices of 19 commercially available rapid antigen tests for the detection of SARS-CoV-2. *Sci*  
313 *Rep* 2021;**11**:1–8. doi:<https://doi.org/10.1038/s41598-021-97489-9>
- 314 12 Schober P, Schwarte LA. Correlation coefficients: Appropriate use and interpretation. *Anesth*  
315 *Analg* Published Online First: 2018. doi:10.1213/ANE.0000000000002864
- 316 13 GOV.UK. Vaccinations in the UK. Coronavirus UK.  
317 2022.<https://coronavirus.data.gov.uk/details/vaccinations>
- 318 14 Mahase E. Covid-19: Is the UK heading for another omicron wave? *BMJ* 2022;**376**.

319 doi:<https://doi.org/10.1136/bmj.o738>

320 15 Brümmer LE, Katzenschlager S, Gaeddert M, *et al.* Accuracy of novel antigen rapid diagnostics  
321 for SARS-CoV-2: A living systematic review and meta-analysis. *PLoS Med.* 2021.

322 doi:[10.1371/journal.pmed.1003735](https://doi.org/10.1371/journal.pmed.1003735)

323 16 Callahan C, Lee R, Lee G, *et al.* Nasal-Swab Testing Misses Patients with Low SARS-CoV-2 Viral  
324 Loads. *medRxiv* 2020.

325 17 Jing M, Bond R, Robertson LJ, *et al.* User experience of home-based AbC-19 SARS-CoV-2  
326 antibody rapid lateral flow immunoassay test. *Sci Rep* 2022;**12**:1173. doi:[10.1038/s41598-](https://doi.org/10.1038/s41598-022-05097-y)  
327 [022-05097-y](https://doi.org/10.1038/s41598-022-05097-y)

328 18 World Health Organization (WHO). Coronavirus disease (COVID-19) Pandemic — Emergency  
329 Use Listing Procedure (EUL) open for IVDs. Prequalification Med. Prod. (IVDs, Med. Vaccines  
330 Immun. Devices, Vector Control. [https://extranet.who.int/pqweb/vitro-](https://extranet.who.int/pqweb/vitro-diagnostics/coronavirus-disease-covid-19-pandemic---emergency-use-listing-procedure-eul-open)  
331 [diagnostics/coronavirus-disease-covid-19-pandemic---](https://extranet.who.int/pqweb/vitro-diagnostics/coronavirus-disease-covid-19-pandemic---emergency-use-listing-procedure-eul-open)  
332 [emergency-use-listing-procedure-eul-](https://extranet.who.int/pqweb/vitro-diagnostics/coronavirus-disease-covid-19-pandemic---emergency-use-listing-procedure-eul-open)  
[open](https://extranet.who.int/pqweb/vitro-diagnostics/coronavirus-disease-covid-19-pandemic---emergency-use-listing-procedure-eul-open)

333 19 Hanson KE, Barker AP, Hillyard DR, *et al.* Self-collected anterior nasal and saliva specimens  
334 versus health care worker-collected nasopharyngeal swabs for the molecular detection of  
335 SARS-CoV-2. *J Clin Microbiol* Published Online First: 2020. doi:[10.1128/JCM.01824-20](https://doi.org/10.1128/JCM.01824-20)

336 20 Tu Y-P, Jennings R, Hart B, *et al.* Swabs Collected by Patients or Health Care Workers for  
337 SARS-CoV-2 Testing. *N Engl J Med* Published Online First: 2020. doi:[10.1056/nejmc2016321](https://doi.org/10.1056/nejmc2016321)

338

339

340

341



342

343

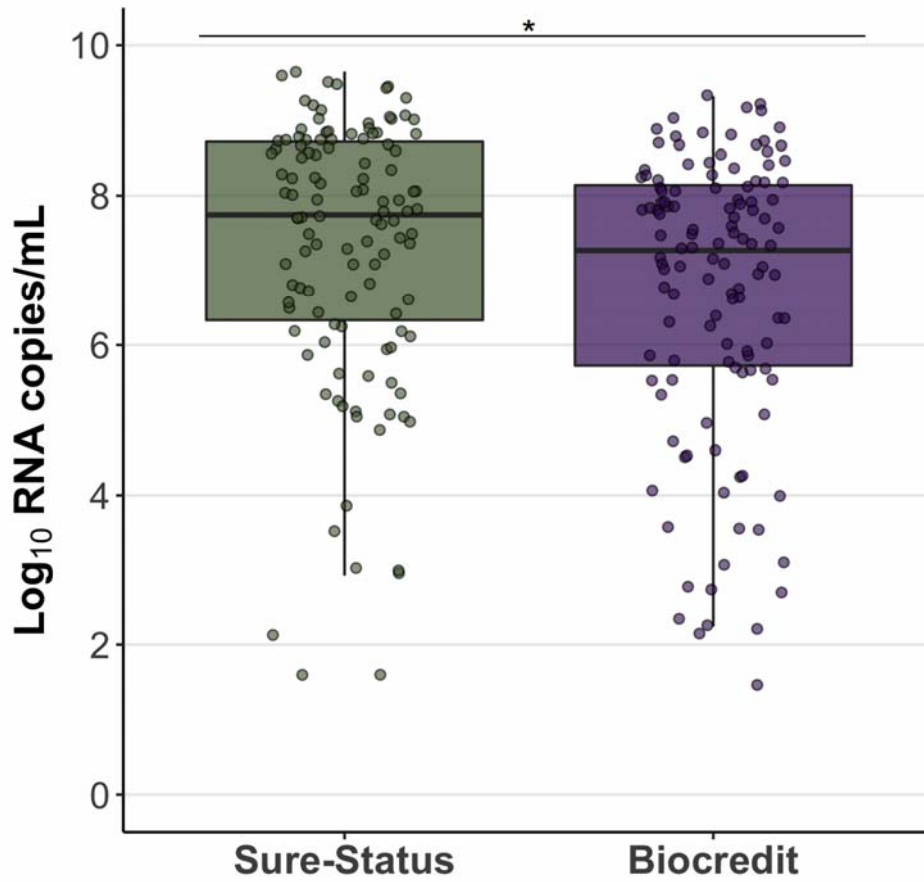

344

345 **Figure 1.** Boxplot of the SARS-CoV-2 viral load distribution of the RT-qPCR NP swabs used as  
346 reference standard for the participants enrolled for Sure-Status and Biocredit Ag-RDT evaluation.  
347 The whiskers show the maximum and minimum values and the vertical line the median. Asterisks  
348 indicate statistical significance between AN and NP swab types.

349

350

351

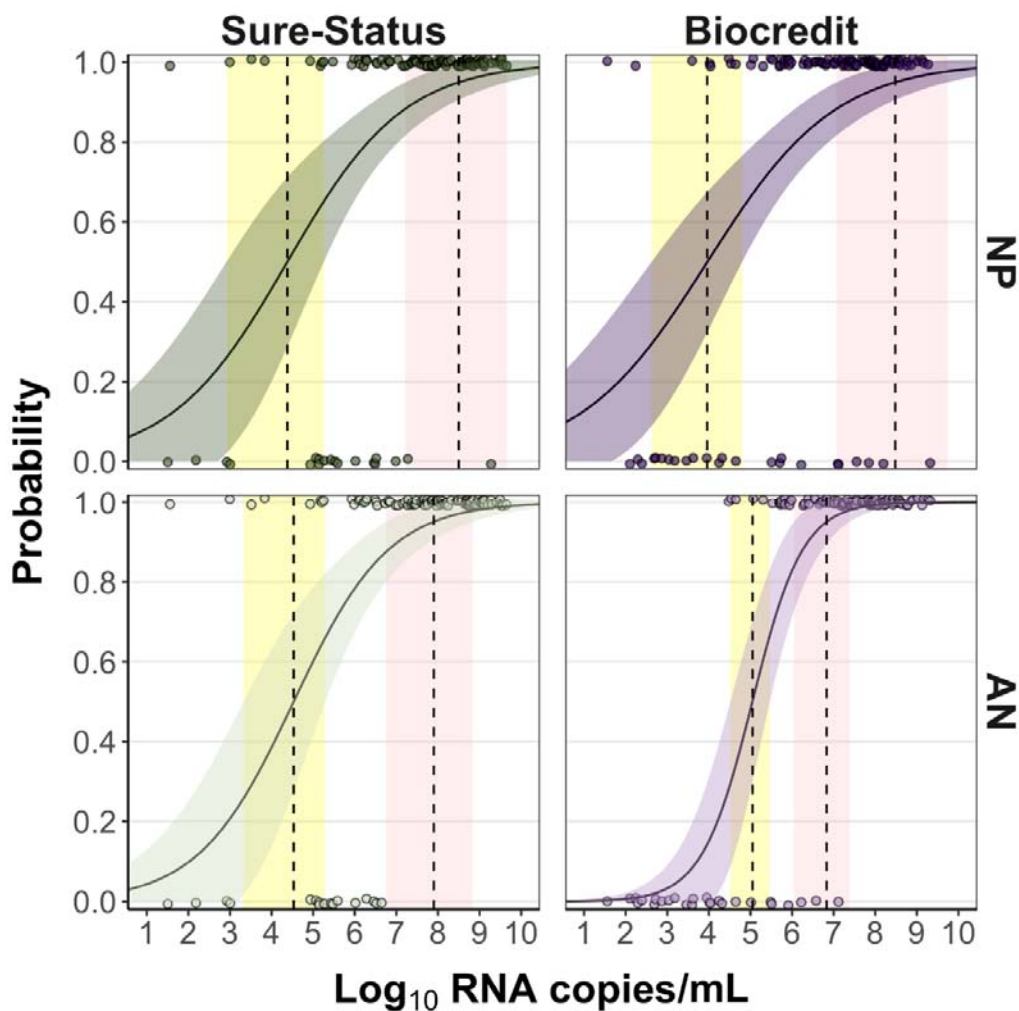

352  
353 **Figure 2.** Limit of detection analyses of upper-respiratory samples positive by RT-qPCR for Sure-  
354 Status and Biocredit using AN and NP swabs. The log<sub>10</sub> RNA copies on the x axis were plotted  
355 against a positive (1.0) or negative (0.0) Ag-RDT result on the y axis. Green (Sure-Status) and purple  
356 (Biocredit) curves show logistic regressions of the viral load on the Ag-RDT result; vertical dashed  
357 lines indicate log<sub>10</sub> RNA copies subjected to the test at which 50% and 95% LoD of the samples are  
358 expected positive based on the regression results. No significant differences were observed.

359  
360

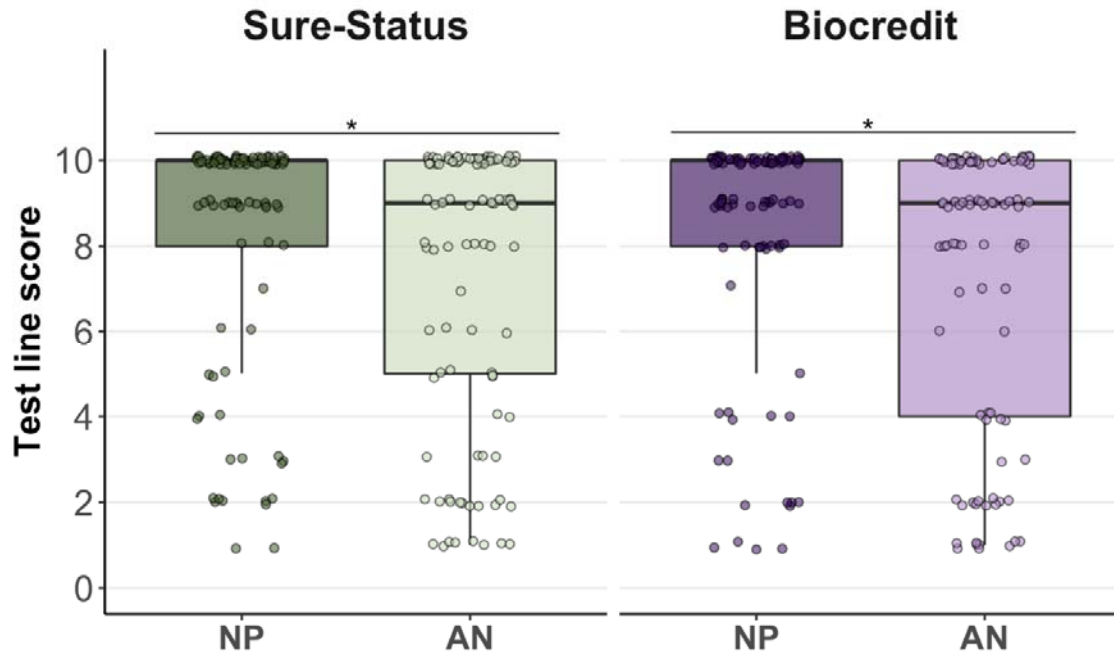

361  
362 **Figure 3.** Boxplot of the scores of the test lines for both Ag-RDT Sure-Status and Biocredit using AN  
363 and NP swabs. The whiskers show the maximum and minimum values and the vertical line the  
364 median. Asterisks indicate statistical significance between AN and NP swab types.

365

366

367

368

369

370

371

372

373

374

375 **Table 1.** Demographics of the population of study for Sure-Status and Biocredit cohorts

|                                                  | Sure-Status             | Biocredit               | All                      |
|--------------------------------------------------|-------------------------|-------------------------|--------------------------|
| Total                                            | 372                     | 232                     | 604                      |
| Age [mean (min-max), IQR]                        | 43 (18-81), 33-53       | 43 (18-78), 33-51       | 43 (18-81), 33-52        |
| Gender [%F, (n/N)] IQR]                          | 57%, (211/372)          | 59%, (137/232)          | 58%, (348/602)           |
| Triple vaccinated (n, %)                         | NA*                     | 143 (61.6%)             | 143 (23.8%)              |
| Double vaccinated (n, %)                         | 314 (84.4%)             | 74 (40%)                | 388 (64.4%)              |
| Partially vaccinated (n, %)                      | 29 (7.8%)               | 4 (1.7%)                | 33 (5.5%)                |
| Not vaccinated (n, %)                            | 27 (7.3%)               | 10 (4.3%)               | 37 (6.2%)                |
| Vaccination not disclosed (n, %)                 | 2 (0.5)                 | 1 (0.3%)                | 3 (0.5%)                 |
| Days symptoms onset [median (IQR); N]            | 2 (1-3), 371            | 2 (1-3), 232            | 2 (1-3), 601             |
| Days 0-3 (n, %)                                  | 304, 81.7%              | 186, 80.2%              | 490, 81.1%               |
| Days 4-7 (n, %)                                  | 56, 15.1%               | 41, 17.7%               | 97, 16.1%                |
| Days 8+ (n, %)                                   | 10, 2.7%                | 5, 2.2%                 | 15, 2.5%                 |
| RT-qPCR SARS-CoV-2 Positivity [%, (n/N)]         | 32.1%, (119/371)        | 53.7%, (122/227)        | 40.3% (241/598)          |
| Symptom [total n (%), in RT-qPCR positive n (%)] |                         |                         |                          |
| Cough                                            | 248 (66.7%), 73 (61.3%) | 139 (60.0%), 71 (58.2%) | 387 (64.3%), 144 (60.0%) |
| Sore throat                                      | 129 (34.7%), 34 (28.6%) | 103 (44.4%), 56 (45.9%) | 232 (38.5%), 90 (37.4%)  |
| Headache                                         | 123 (33.1%), 57 (47.9%) | 80 (34.5%), 45 (36.9%)  | 203 (33.7%), 102 (42.3%) |
| Fever                                            | 106 (28.5%), 30 (25.2%) | 54 (23.3%), 28 (22.9%)  | 160 (26.6%), 58 (24.1%)  |
| Body aches                                       | 41 (11.0%), 21 (17.7%)  | 39 (16.8%), 29 (23.8%)  | 80 (13.3%), 51 (21.2%)   |
| Runny nose                                       | 39 (13.2%), 20 (16.8%)  | 41 (17.7%), 31 (25.4%)  | 80 (13.3%), 51 (21.2%)   |
| Loss taste                                       | 48 (12.9%), 19 (16.0%)  | 19 (8.2%), 10 (8.2%)    | 67 (11.1%), 29 (12.0%)   |
| Loss smell                                       | 29 (7.8%), 9 (7.6%)     | 14 (6.0%), 7 (5.7%)     | 43 (7.1%), 16 (6.6%)     |
| Chest pain                                       | 18 (4.8%), 7 (5.9%)     | 12 (5.2%), 8 (6.6%)     | 30 (5.0%), 15 (6.2%)     |
| Fatigue                                          | 13 (3.5%), 4 (3.4)      | 17 (7.3%), 10 (8.2%)    | 30 (5.0%), 14 (5.8%)     |
| Shortness of breath/tight chest                  | 13 (3.5%), 3 (2.5%)     | 9 (3.9%), 5 (4.1%)      | 22 (3.6%), 15 (6.2%)     |
| Vomiting                                         | 11 (3%), 5 (4.2%)       | 2 (8.6%), 2 (1.6%)      | 13 (2.2%), 7 (2.9%)      |
| Diarrhoea                                        | 9 (2.4%), 3 (2.5%)      | 3 (13%), 3 (2.5%)       | 12 (2.0%), 6 (2.5%)      |
| Abdominal pain                                   | 6 (1.6%), 3 (2.5%)      | 1 (0.4%), 1 (0.8%)      | 7 (1.2%), 4 (1.7%)       |
| Rash                                             | 3 (0.8%), 0 (0.0%)      | 1 (0.4%), 1 (0.8%)      | 4 (0.6%), 1 (0.4%)       |
| Confusion                                        | 1 (0.3%), 0 (0.0%)      | 0 (0%)                  | 1 (0.2%), 0 (0%)         |
| Other                                            | 159 (42.7%), 68 (57.4%) | 134 (57.8%), 85 (69.7%) | 293 (48.7%), 153 (63.5%) |

376 \*Participants were enrolled before booster rolled out in the UK

377

378

379

380

381 **Table 2.** Clinical sensitivity and specificity of Sure-Status and Biocredit using NP and Nasal Swab

| All Ct values | TP  | FP | TN  | FN | Sensitivity      | Specificity      | NPV               | PPV                |
|---------------|-----|----|-----|----|------------------|------------------|-------------------|--------------------|
| Sure-Status   | 200 | 5  | 494 | 38 | 83.9 (78.3-88.1) | 99.0 (97.7-99.7) | 92.7(90.5-94.4)   | 97.6 (94.3-98.9)   |
| NP swab       | 99  | 2  | 249 | 20 | 83.2 (75.2-89.4) | 98.8 (96.5-99.6) | 91.7 (88.4-94.2)  | 97.1 (91.44-99.03) |
| AN swab       | 101 | 2  | 245 | 18 | 84.0 (76.2-90.1) | 99.2 (97.0-99.8) | 92.8 (89.5-95.1)  | 98.0 (92.62-99.5)  |
| Biocredit     | 196 | 1  | 209 | 48 | 80.3 (74.8-85.1) | 99.1 (95.0-99.9) | 81.3(77.2-84.9)   | 99.5 (96.5-100)    |
| NP swab       | 99  | 1  | 104 | 23 | 81.2 (73.1-87.7) | 99.0 (94.7-86.5) | 81.9 (73.99-85.2) | 99.0 (93.4-99.9)   |
| AN swab       | 97  | 0  | 105 | 25 | 79.5 (71.3-86.3) | 100 (96.5-100)   | 80.8 (74.8-85.6)  | 100 (100-100)      |
| All NP        | 198 | 4  | 353 | 43 | 82.2 (76.7-86.8) | 98.9 (97.2-99.7) | 89.1 (86.2-91.5)  | 98.0 (94.9-99.2)   |
| All AN        | 198 | 2  | 350 | 43 | 82.2 (76.7-86.8) | 99.4 (97.9-99.9) | 89.1 (86.2-91.5)  | 99.0 (96.1-99.8)   |
